# Supplementary material for: Electrosynthesized CuOx/graphene by a four-electrode electrolysis system for the oxygen reduction reaction to hydrogen peroxide
Source: Royal Society of Chemistry journal article supplement (doi:10.1039/d1cc00386k), 2021-01-01
Supplement: d1cc00386k1.pdf [file d1cc00386k1.pdf]

## Electrosynthesized CuO<sub>x</sub>/graphene by a four-electrode electrolysis system for oxygen reduction reaction to hydrogen peroxide

### Experimental

#### *Chemicals and materials*

Graphite powder was bought from Qingdao Graphite Company. Copper wire was purchased from Runde Metal Material Company. Anhydrous ethanol (99.5%) was purchased from Woke Company. Tetrabutylammonium tetrafluoroborate (TBABF<sub>4</sub>, 98%, powder) and propylene carbonate (PC, ≥99.9%) were bought from Aladdin.

#### *Characterization*

X-ray diffraction (XRD) analysis was applied to analysis the crystalline of as-prepared samples on an X-ray diffractometer (Ultima IV-185) using Cu K $\alpha$  radiation. Raman spectra were applied to test the defective properties of sample on a JobinYvon LabRAM HR800 micro-Raman spectrometer. X-ray photoelectron spectroscopy (XPS) was operated to detect the chemical compositions of the materials on Thermo Fisher SCIENTIFIC with Al K $\alpha$  X-ray source. Scanning electron microscopy (SEM, JSM-7001F) and transmission electron microscopy (TEM, FEI Tecnai F20) were used to study the morphologies of the samples. Inductively Coupled Plasma Optical Emission Spectrometer (ICP-OES) was measured to analyze the chemical composition (Cu) of the obtained samples.

### *Preparation of CuO<sub>x</sub>/graphene*

A facile four-electrode electrolysis system is first designed to synthesize the CuO<sub>x</sub>/graphene composites as shown in Fig. 1. 50 mg of graphite was put in a porous plastic tube with a platinum plate inserted and served as negative electrode and positive electrode respectively. These two electrodes were put in propylene carbonate (PC) solvent containing 0.1 M tetrabutylammonium tetrafluoroborate (TBABF<sub>4</sub>). Copper wire bipolar electrodes were put in both sides of graphite electrode respectively. A voltage (30 V, 20 V or 10 V) was applied for 4 h. After the electrochemical expansion step, the exfoliated graphite was taken out from the cathode and dispersed in the electrolyte solution. This mixture was stirred for 12 h and then transferred into 100 ml Teflon cup inserted in a stainless steel autoclave. After continuous Ar gas (0.5 h) flowed through the Teflon cup to completely remove the air, the solution was treated at 160 °C under stirring (500 round min<sup>-1</sup>) for 12 h. Finally the samples were filter washed with PC solution for three times and ethanol for three times, then dried in a vacuum oven at 80 °C for 8 h.

### *Electrochemical tests*

Electrochemical properties of CuO<sub>x</sub>/graphene catalysts were tested in 1 M KOH solution by a CHI Instruments 760E electrochemical workstation using a standard three-electrode setup. A graphite rod, a modified glassy carbon electrode (GCE), and Hg/HgO (dipped in 1M KOH) were used as the counter, working, and reference electrodes, respectively. The rotating disk electrode (RDE, diameter = 3mm) is used as the working electrode on which deposited with the catalysts ink. The catalyst ink

was prepared by dispersing 5.0 mg of catalyst into 0.75ml of anhydrous ethanol and 0.25ml of ultrapure water with 0.03ml of Nafion solution (5 wt%), then treated with ultra-sonication for 30 min. Rotating ring disk electrode (RRDE, diameter = 4 mm) was also used as a working electrode to detect hydrogen peroxide.

Prior to each measurement, N<sub>2</sub> gas was bubbled through the electrolyte for 30 min in order to expel O<sub>2</sub>. Furthermore, to remove any organic species, cyclic voltammograms (CVs) were measured in a 1M KOH aqueous solution at a scan rate of 50 mVs<sup>-1</sup> under N<sub>2</sub> ambient. Then repeat the above CV test with oxygen saturation for 30 min. The electrocatalytic activity for ORR was investigated by linear sweep voltammograms (LSVs), with scan rate of 5mV/s at different rotational speeds. All electrochemical measurement was performed at room temperature. All potentials were converted to reversible hydrogen electrode (RHE) according to the following equation:

$$E(\text{RHE}) = E(\text{Hg/HgO}) + 0.0591 \cdot \text{pH} + 0.098$$

The kinetic current ( $j_k$ ) value can be analyzed on the basis of Koutecky-Levich (K-L) equation.

$$\frac{1}{j} = \frac{1}{j_k} + \frac{1}{j_d} + \frac{1}{j_f}$$

$j_f^{-1}$  is very small and negligible

$$j_d = 0.620nFA C_o D^{2/3} \omega^{1/2} \nu^{-1/6}$$

$j$  is the measured current density,  $j_k$  and  $j_d$  are the kinetic and diffusion-limiting current densities,  $n$  is the overall number of electrons transferred in O<sub>2</sub> reduction,  $F$  is Faraday constant ( $F=96485\text{C/mol}$ ),  $A$  is area of electrode,  $C_o$  is the concentration of oxygen in solution, ( $C_o=1.21 \times 10^{-6}$ )  $D$  is the rate of diffusion of oxygen

molecules( $D=1.65 \times 10^{-5}$ ),  $\omega$  is the angular velocity of the disk ( $\omega=2\pi N$ ,  $N$  is the linear rotation speed),  $\nu$  is the kinetic viscosity of the solution( $0.01 \text{ cm}^2/\text{s}$ ). The  $n$  value and  $j_k$  can be obtained from the slope and intercept of the K-L plots, respectively.

RRDE measurements were performed to calculate the electron transfer number ( $n$ ) and hydrogen peroxide selectivity ( $\% \text{H}_2\text{O}_2$ ) of catalysts during ORR from the following equation.  $I_d$  and  $I_r$  represent the disk and ring current respectively,  $N$  refers to the collection efficiency of Pt ring, which is ( $N=0.49$ ) in this study.

$$n = \frac{4I_d}{I_d + (I_r/N)}$$

$$\text{H}_2\text{O}_2\% = 100 * \frac{4 - n}{2}$$

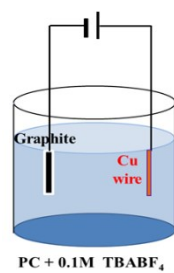

**Fig. S1** The initial electrochemical synthesis device of  $\text{CuO}_x/\text{G}$ .

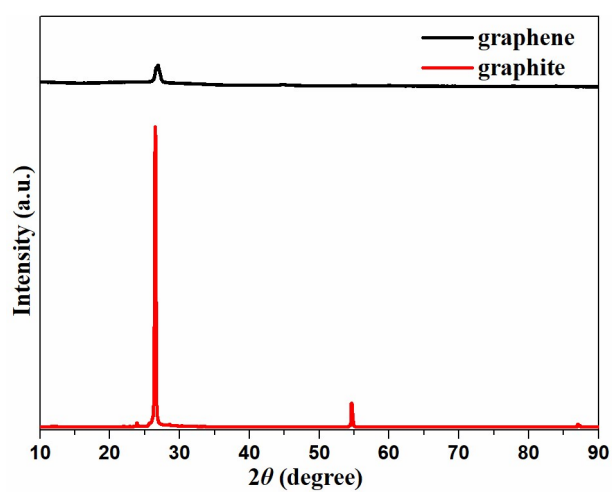

**Fig. S2** The XRD spectra of graphene and graphite

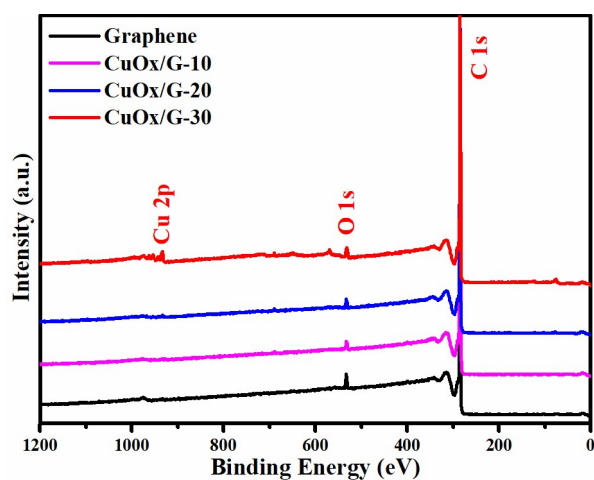

**Fig. S3** The XPS survey spectra of these as-prepared samples

**Table S1** The content of Cu with different oxidation states calculated based on the ICP-OES results and XPS results.

| Voltage<br>(V) | Cu <sup>+</sup><br>mol%<br>(XPS) | Cu <sup>2+</sup><br>mol%<br>(XPS) | Cu <sup>2+</sup> /Cu <sup>+</sup><br>ratio<br>(XPS) | Cu wt%<br>(ICP-OES) | Cu <sub>2</sub> O<br>wt%<br>(Cal.) | CuO<br>wt%<br>(Cal.) |
|----------------|----------------------------------|-----------------------------------|-----------------------------------------------------|---------------------|------------------------------------|----------------------|
| 10             | 57.5                             | 42.5                              | 0.74                                                | 0.85                | 0.55                               | 0.45                 |
| 20             | 48.0                             | 52.0                              | 1.08                                                | 2.18                | 1.18                               | 1.42                 |
| 30             | 35.8                             | 64.2                              | 1.79                                                | 11.71               | 4.71                               | 9.40                 |

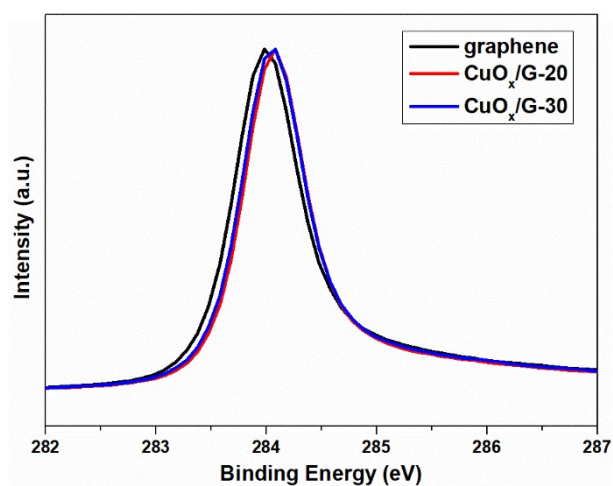

**Fig. S4** The XPS C1s spectra of these as-prepared samples

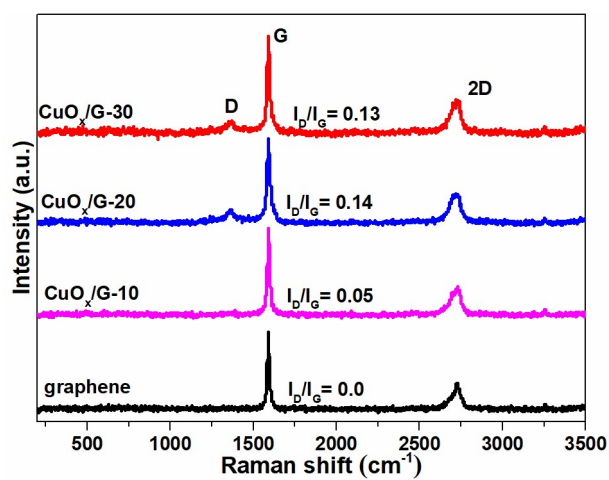

**Fig. S5** Raman spectra of the samples prepared at different electrolytic voltages and graphene prepared at 30 V.

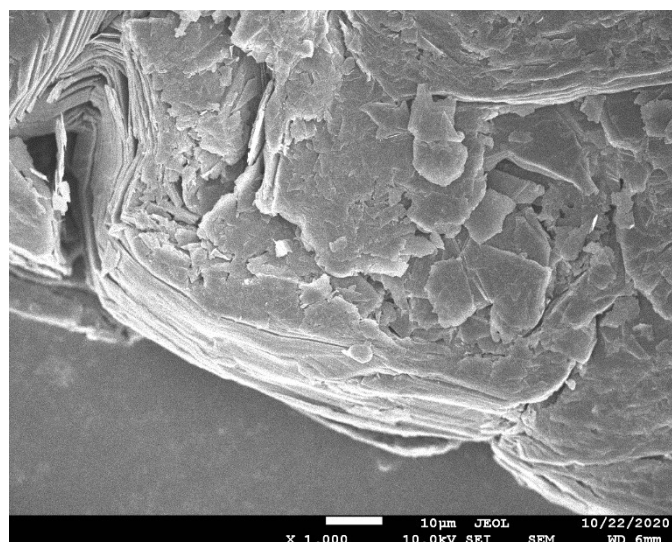

**Fig. S6** Representative SEM micrograph of graphite powder;

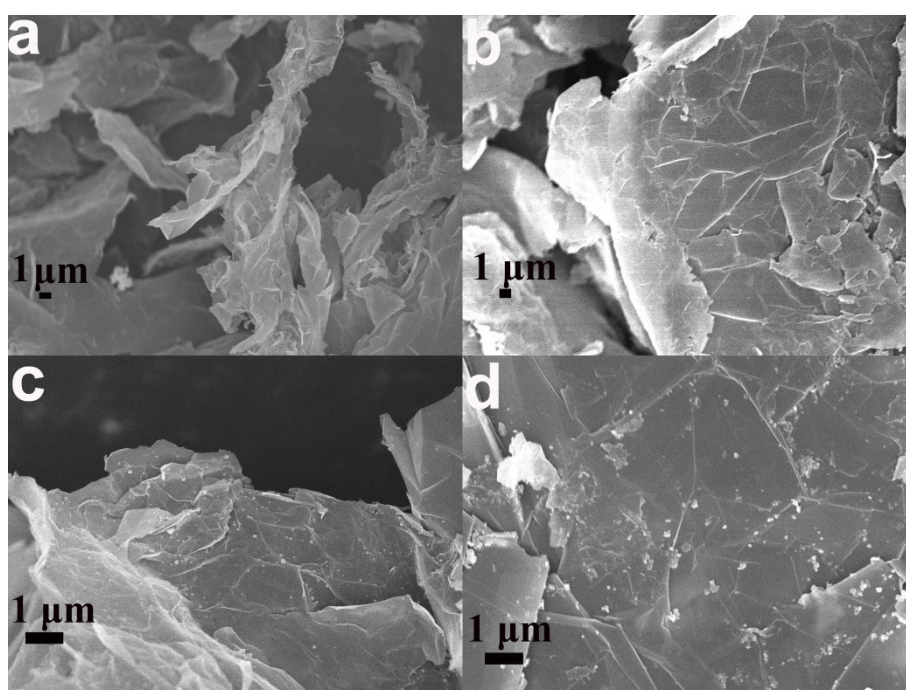

**Fig. S7** (a) Representative SEM micrograph of obtained graphene prepared at 30 V via electrochemical exfoliation;  
 (b) Representative SEM micrograph of CuO<sub>x</sub>/G-10 prepared at 10 V; (c) Representative SEM micrograph of  
 CuO<sub>x</sub>/G-20 prepared at 20 V; (d) Representative SEM micrograph of CuO<sub>x</sub>/G-30 prepared at 30 V.



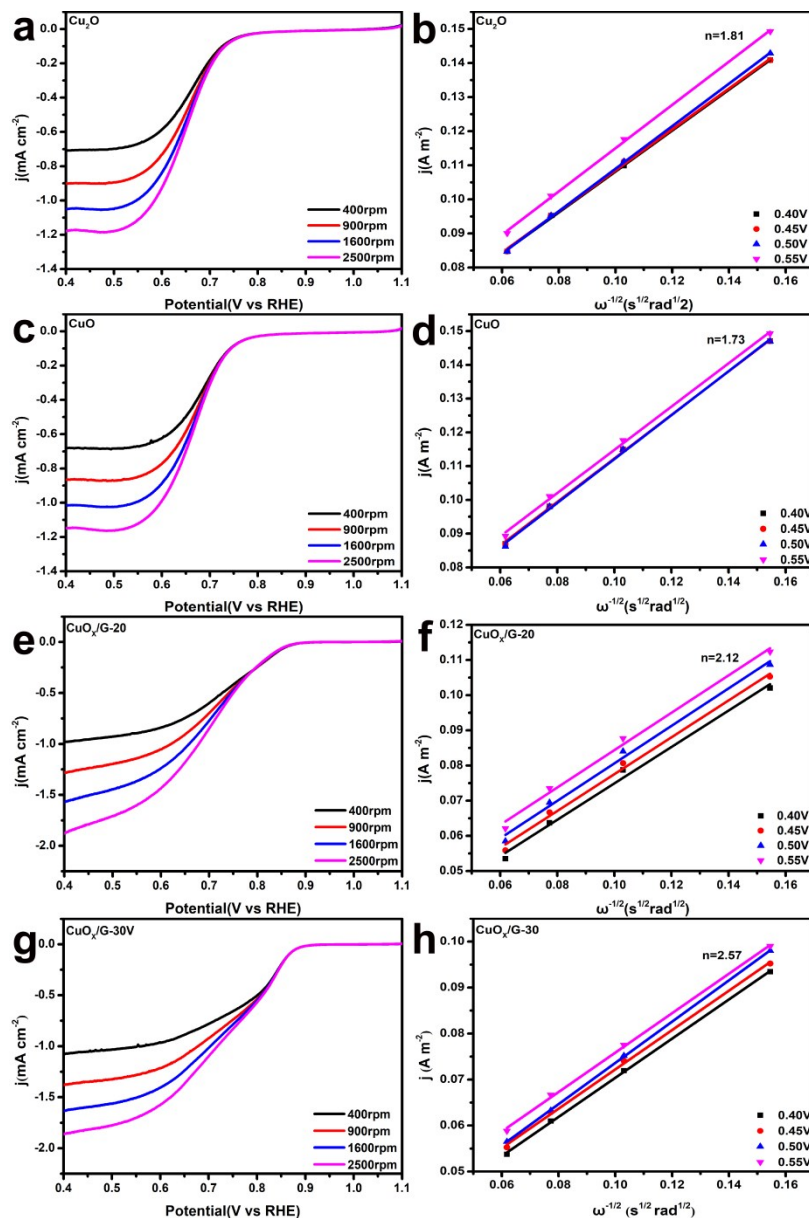

**Fig. S8** (a) Rotating-disk voltammograms of CuO in O<sub>2</sub>-saturated 1.0 M KOH with a sweep rate of 5 mVs<sup>-1</sup> at different rotation rates; (b) Koutecky–Levich plots ( $J^{-1}$  versus  $\omega^{-0.5}$ ) at different potentials corresponding to (a); (c) Rotating-disk voltammograms of Cu<sub>2</sub>O in O<sub>2</sub>-saturated 1.0 M KOH with a sweep rate of 5mVs<sup>-1</sup> at different rotation rates; (d) Koutecky–Levich plots ( $J^{-1}$  versus  $\omega^{-0.5}$ ) at different potentials corresponding to (c); (e) Rotating-disk voltammograms of CuO<sub>x</sub>/G-20 V in O<sub>2</sub>-saturated 1.0 M KOH with a sweep rate of 5 mVs<sup>-1</sup> at different rotation rates; (f) Koutecky–Levich plots ( $J^{-1}$  versus  $\omega^{-0.5}$ ) at different potentials corresponding to (e); (g) Rotating-disk voltammograms of CuO<sub>x</sub>/G-30 V in O<sub>2</sub>-saturated 1.0 M KOH with a sweep rate of 5 mVs<sup>-1</sup> at different rotation rates; (h) Koutecky–Levich plots ( $J^{-1}$  versus  $\omega^{-0.5}$ ) at different potentials corresponding to (g);

H<sub>2</sub>O<sub>2</sub> generation was performed in a H-type electrolytic cell separated by Nafion 115 membrane using chronoamperometry at 0.5 V vs. RHE for 120 min. Both compartments were filled with 40 mL of the same electrolyte. The catalyst suspension (50 µL) was loaded onto 1.2 cm × 1 cm carbon fiber paper to prepare the working electrode. The H<sub>2</sub>O<sub>2</sub> (HO<sub>2</sub><sup>•</sup>) produced was quantified by Ce(SO<sub>4</sub>)<sub>2</sub> titration method<sup>1</sup>. The yellow transparent Ce(SO<sub>4</sub>)<sub>2</sub> solution (1mM) was prepared by dissolving 33.2 mg Ce(SO<sub>4</sub>)<sub>2</sub> in 100 ml 0.5 M sulfuric acid solution. To obtain the calibration curve, H<sub>2</sub>O<sub>2</sub> with known concentration was added to Ce(SO<sub>4</sub>)<sub>2</sub> solution and measured by ultraviolet-visible spectroscopy. Based on the linear relationship between the signal intensity and Ce<sup>4+</sup> concentration (~0.2–1.0 mM), the H<sub>2</sub>O<sub>2</sub> concentration of the sample could be obtained.

The faradaic efficiency of H<sub>2</sub>O<sub>2</sub> production was calculated as follows:

$$FE(H_2O_2\%) = \frac{2CVF}{Q}$$

where C is the concentration of H<sub>2</sub>O<sub>2</sub> (M), V is the volume of electrolyte (L), F is the Faraday constant (C mol<sup>-1</sup>), and Q is the quantity of charge passed through the cell.

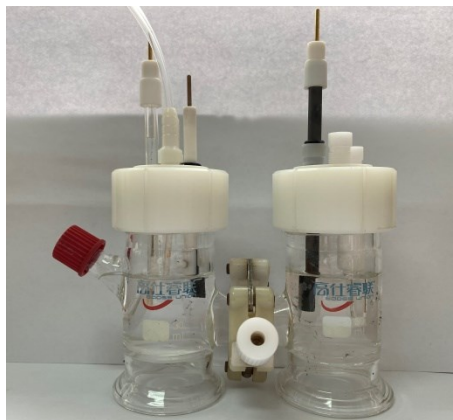

**Fig. S9** H-shaped electrochemical cell.

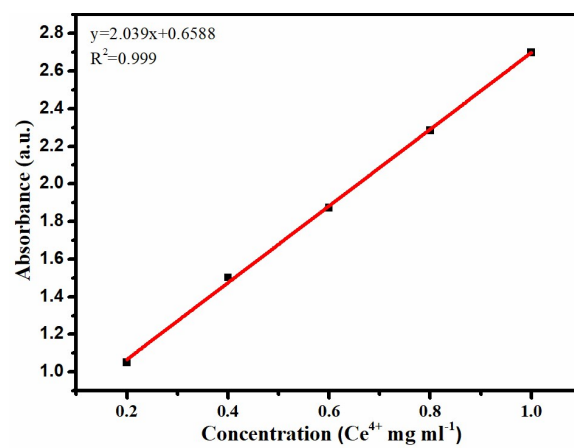

**Fig. S10** The calibration curve of  $\text{Ce}^{4+}$  concentration with absorbance tested by ultraviolet-visible spectroscopy.
